# Supplementary material
Source: HighWire-hosted journal article supplement (http://molpharm.aspetjournals.org/highwire/filestream/76873/field_highwire_adjunct_files/4/Bhave_SuppFig._5.pdf)
Supplement: Bhave_SuppFig._5.pdf [file Bhave_SuppFig._5.pdf]

**Development of a selective small-molecule inhibitor of Kir1.1, the Renal Outer Medullary Potassium Channel.** Gautam Bhave, Brian A. Chauder, Wen Liu, Eric S. Dawson, Rishin Kadakia, Thuy, T. Nguyen, L. Michelle Lewis, Jens Meiler, C. David Weaver, Lisa M. Satlin, Craig W. Lindsley, and Jerod S. Denton. *Molecular Pharmacology*.

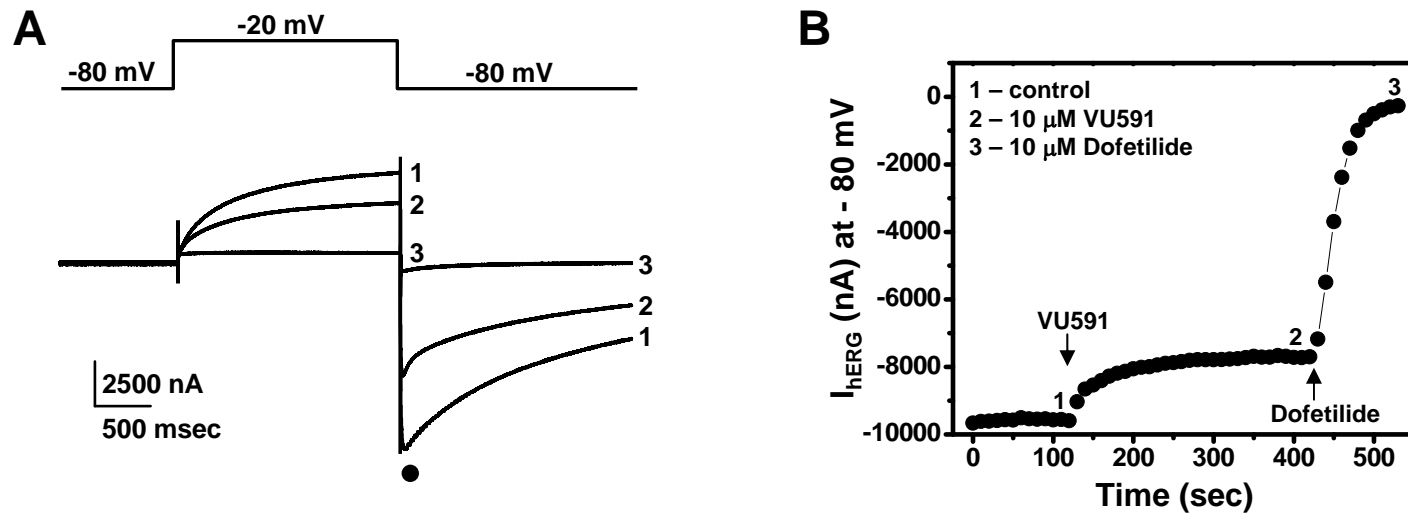

**Supplemental Figure 5.** (A) Whole-cell hERG current traces evoked from *Xenopus* oocytes using the voltage clamp protocol shown. Current traces 1 (control), 2 (10  $\mu$ M VU591) and 3 (10  $\mu$ M Dofetilide) were taken from the time course experiment shown in (B) where indicated with the corresponding numbers. Tail current at -80 mV is shown.
